# Supplementary material for: Selectivity Tuning by Natural Deep Eutectic Solvents (NADESs) for Extraction of Bioactive Compounds from Cytinus hypocistis—Studies of Antioxidative, Enzyme-Inhibitive Properties and LC-MS Profiles
Source: MDPI journal article supplement (doi:10.3390/molecules27185788), 2022-09-07
Supplement: s1 [file s1]

# Selectivity tuning by natural deep eutectic solvents (NADES) for extraction of bioactive compounds from *Cytinus hypocistis* – studies of antioxidative and enzyme inhibitive properties and LC-MS profiles

Gokhan Zengin<sup>1</sup>, María de la Luz Cádiz-Gurrea<sup>2\*</sup>, Álvaro Fernández-Ochoa<sup>2\*</sup>, Francisco Javier Leyva-Jiménez<sup>3,4</sup>, Malwina Momotko<sup>5</sup>, Evren Yildiztugay<sup>6</sup>, Refik Karatas<sup>1</sup>, Sharmeen Jugreet<sup>7</sup>, Mohamad Fawzi Mahoomodally<sup>7,8,9</sup>, Grzegorz Boczkaj<sup>10,11</sup>

<sup>1</sup>Department of Biology, Science Faculty, Selcuk University, Konya, Turkey

<sup>2</sup>Department of Analytical Chemistry, Faculty of Sciences, University of Granada, Fuentenueva s/n, E- 18071 Granada, Spain

<sup>3</sup>Department of Analytical Chemistry and Food Science and Technology, University of Castilla-La Mancha, Ronda de Calatrava 7, 13071, Ciudad Real, Spain

<sup>4</sup>Regional Institute for Applied Scientific Research (IRICA), Area of Food Science, University of Castilla-La Mancha, Avenida Camilo Jose Cela, 10, 13071, Ciudad Real, Spain

<sup>5</sup>Gdansk University of Technology, Faculty of Chemistry, Department of Process Engineering and Chemical Technology, 80 – 233 Gdansk, G. Narutowicza St. 11/12, Poland

<sup>6</sup>Department of Biotechnology, Science Faculty, Selcuk University, Konya, Turkey

<sup>7</sup>Department of Health Sciences, Faculty of Medicine and Health Sciences, University of Mauritius, Réduit 80837, Mauritius

<sup>8</sup>Center for Transdisciplinary Research ,Department of Pharmacology ,Saveetha Dental College ,Saveetha Institute of Medical and Technical Science ,Chennai ,India

<sup>9</sup>Centre of Excellence for Pharmaceutical Sciences (Pharmacem), North West University, South Africa

<sup>10</sup>Gdansk University of Technology, Faculty of Civil and Environmental Engineering, Department of Sanitary Engineering, 80 – 233 Gdansk, G. Narutowicza St. 11/12, Poland

<sup>11</sup>Advanced Materials Center, Gdansk University of Technology, 80 – 233 Gdansk, G. Narutowicza St. 11/12, Poland

\* Correspondence: mluzcadiz@ugr.es; alvaroferochoa@ugr.es

Table S1. Total phenolic (TPC) and flavonoid content (TFC) of the tested extracts.

| <b>Solvents</b> | <b>TPC (mg GAE/g)</b>     | <b>TFC (mg RE/g)</b>    |
|-----------------|---------------------------|-------------------------|
| Hexane          | 26.47±0.96 <sup>g</sup>   | 0.68±0.02 <sup>g</sup>  |
| Ethyl acetate   | 127.83±1.93 <sup>d</sup>  | 12.55±0.35 <sup>a</sup> |
| Dichloromethane | 43.28±0.06 <sup>f</sup>   | 1.85±0.01 <sup>f</sup>  |
| Ethanol         | 123.68±0.59 <sup>e</sup>  | 8.82±0.44 <sup>c</sup>  |
| Ethanol/water   | 123.51±0.86 <sup>e</sup>  | 11.44±0.14 <sup>b</sup> |
| Water           | 126.56±1.47 <sup>de</sup> | 9.35±0.18 <sup>c</sup>  |
| NADES-A         | 174.67±0.62 <sup>b</sup>  | 5.89±0.15 <sup>d</sup>  |
| NADES-B         | 186.13±1.84 <sup>a</sup>  | 3.82±0.06 <sup>e</sup>  |
| NADES-C         | 167.57±1.45 <sup>c</sup>  | 1.51±0.08 <sup>f</sup>  |

Values are reported as mean ±SD of three parallel experiments. GAE: Gallic acid equivalent; RE: Rutin equivalent. Different letters in same column indicate significant differences in the tested extracts (p<0.05)

Table S2. Proposed annotated compounds by UPLC-ESI-QTOF-MS in all *Cytinus* extracts.

| Peak | RT (min) | m/z      | m/z theoretical | Error (ppm) | Formula                                                       | Proposed identification of the compounds | MS Fragments                        |
|------|----------|----------|-----------------|-------------|---------------------------------------------------------------|------------------------------------------|-------------------------------------|
| 1    | 0.46     | 201.0248 | 201.0265        | -8.86       | C <sub>5</sub> H <sub>6</sub> N <sub>4</sub> O <sub>5</sub>   | Hydroxy-pseudouric acid                  | 201.0248                            |
| 2    | 0.47     | 343.0364 | 343.0307        | 16.54       | C <sub>13</sub> H <sub>12</sub> O <sub>11</sub>               | Galloyl-galactarolactone                 | 343.0364                            |
| 3    | 0.47     | 217.0023 | 217.0006        | 7.71        | C <sub>4</sub> H <sub>5</sub> N <sub>5</sub> O <sub>4</sub> P | Unknown 1                                | ---                                 |
| 4    | 0.61     | 222.1344 | 222.1347        | -1.15       | C <sub>9</sub> H <sub>21</sub> NO <sub>5</sub>                | Unknown 2                                | ---                                 |
| 5    | 0.64     | 114.0555 | 114.0561        | -4.90       | C <sub>5</sub> H <sub>9</sub> NO <sub>2</sub>                 | Proline                                  | 114.0555                            |
| 6    | 0.66     | 341.1083 | 341.1089        | -1.79       | C <sub>12</sub> H <sub>22</sub> O <sub>11</sub>               | Disaccharide                             | 101.0265/179.0698                   |
| 7    | 0.67     | 328.0698 | 328.0674        | 7.43        | C <sub>13</sub> H <sub>15</sub> NO <sub>9</sub>               | Unknown 3                                | ---                                 |
| 8    | 0.67     | 179.0557 | 179.0561        | -2.18       | C <sub>6</sub> H <sub>12</sub> O <sub>6</sub>                 | Glucose                                  | 179.0557                            |
| 9    | 0.71     | 231.0172 | 231.0180        | -3.72       | C <sub>5</sub> H <sub>12</sub> O <sub>8</sub> S               | Unknown 4                                | ---                                 |
| 10   | 0.71     | 191.0552 | 191.0561        | -4.95       | C <sub>7</sub> H <sub>12</sub> O <sub>6</sub>                 | Quinic acid                              | 85.0231/93.0368                     |
| 11   | 0.76     | 493.1202 | 493.1199        | 0.70        | C <sub>19</sub> H <sub>26</sub> O <sub>15</sub>               | Galloyl-diglucose                        | 125.0312/169.0213/493.1202          |
| 12   | 0.79     | 331.0666 | 331.0671        | -1.50       | C <sub>13</sub> H <sub>16</sub> O <sub>10</sub>               | Galloylglucose isomer 1                  | 125.0312/169.0213                   |
| 13   | 1.09     | 331.0661 | 331.0671        | -2.85       | C <sub>13</sub> H <sub>16</sub> O <sub>10</sub>               | Galloylglucose isomer 2                  | 125.0247/169.0160                   |
| 14   | 1.32     | 331.0660 | 331.0671        | -3.17       | C <sub>13</sub> H <sub>16</sub> O <sub>10</sub>               | Galloylglucose isomer 3                  | 125.0244/169.0147                   |
| 15   | 1.64     | 125.0235 | 125.0244        | -6.98       | C <sub>6</sub> H <sub>6</sub> O <sub>3</sub>                  | Pyrogallol                               | 125.0235                            |
| 16   | 1.65     | 169.0137 | 169.0142        | -3.17       | C <sub>7</sub> H <sub>6</sub> O <sub>5</sub>                  | Gallic acid                              | 125.0231/169.0137                   |
| 17   | 1.78     | 331.0662 | 331.0671        | -2.64       | C <sub>13</sub> H <sub>16</sub> O <sub>10</sub>               | Galloylglucose isomer 4                  | 169.0128/331.0662                   |
| 18   | 1.89     | 271.0458 | 271.0459        | -0.44       | C <sub>11</sub> H <sub>12</sub> O <sub>8</sub>                | Fukiic acid                              | 271.0458                            |
| 19   | 4.35     | 483.0775 | 483.0780        | -1.18       | C <sub>20</sub> H <sub>20</sub> O <sub>14</sub>               | Digalloylglucose isomer 1                | 125.0240/169.0130/331.0633          |
| 20   | 4.70     | 483.0769 | 483.0780        | -2.28       | C <sub>20</sub> H <sub>20</sub> O <sub>14</sub>               | Digalloylglucose isomer 2                | 125.0228/169.0113/313.0548/331.0644 |
| 21   | 5.11     | 483.0775 | 483.0780        | -1.18       | C <sub>20</sub> H <sub>20</sub> O <sub>14</sub>               | Digalloylglucose isomer 3                | 125.0266/169.0122/331.0709          |
| 22   | 5.96     | 483.0774 | 483.0780        | -1.28       | C <sub>20</sub> H <sub>20</sub> O <sub>14</sub>               | Digalloylglucose isomer 4                | 125.0236/169.0122/313.0616/331.0616 |
| 23   | 6.17     | 291.0140 | 291.0146        | -2.32       | C <sub>13</sub> H <sub>8</sub> O <sub>8</sub>                 | Brevifolin carboxylic acid               | 191.0273/247.0242                   |
| 24   | 6.39     | 321.0248 | 321.0252        | -1.16       | C <sub>14</sub> H <sub>10</sub> O <sub>9</sub>                | Digallate isomer 1                       | 125.0238/169.0127                   |
| 25   | 6.82     | 601.0463 | 601.0530        | -11.08      | C <sub>19</sub> H <sub>22</sub> O <sub>22</sub>               | Unknown 5                                | ---                                 |

|    |      |          |          |       |           |                                                   |                                                           |
|----|------|----------|----------|-------|-----------|---------------------------------------------------|-----------------------------------------------------------|
| 26 | 6.83 | 635.0876 | 635.0890 | -2.20 | C27H24O18 | Trigalloyl-glucoside isomer 1                     | 107.0138/125.0246/169.0147/465.0677                       |
| 27 | 6.84 | 633.0715 | 633.0733 | -2.97 | C27H22O18 | HHDP-galloylglucose isomer 1                      | 125.0251/169.0129/300.9979/463.0687                       |
| 28 | 6.84 | 465.0660 | 465.0675 | -3.11 | C20H18O13 | Galloylnorbergenin isomer 1                       | 125.0229/169.0125                                         |
| 29 | 7.39 | 247.0239 | 247.0248 | -3.59 | C12H8O6   | Brevifolin                                        | 191.0313/219.0316                                         |
| 30 | 7.49 | 465.0669 | 465.0675 | -1.11 | C20H18O13 | Galloylnorbergenin isomer 2                       | 125.0228/169.0122                                         |
| 31 | 7.81 | 785.0836 | 785.0843 | -0.82 | C34H26O22 | Digalloyl-HHDP-glucose isomer 1                   | 169.0134/301.0093/483.0655                                |
| 32 | 7.91 | 465.0671 | 465.0675 | -0.88 | C20H18O13 | Galloylnorbergenin isomer 3                       | 125.0230/169.0127                                         |
| 33 | 7.91 | 635.0890 | 635.0890 | -0.04 | C27H24O19 | Trigalloyl-glucoside isomer 2                     | 125.0235/169.0149/211.0183/313.0580/<br>465.0672          |
| 34 | 7.93 | 633.0734 | 633.0733 | 0.15  | C27H22O18 | HHDP-galloylglucose isomer 2                      | 125.0244/169.0147/249.0323/275.0092/<br>301.0023/         |
| 35 | 8.00 | 635.0885 | 635.0890 | -0.76 | C27H24O18 | Trigalloyl-glucoside isomer 3                     | 125.0245/169.0143/211.0254/313.0564/<br>465.0665          |
| 36 | 8.30 | 785.0828 | 785.0843 | -1.87 | C34H26O22 | Digalloyl-HHDP-glucose isomer 2                   | 125.0240/169.0123/300.9958/313.0535/<br>463.0874          |
| 37 | 8.39 | 633.0723 | 633.0733 | -1.64 | C27H22O18 | HHDP-galloylglucose isomer 3                      | 125.0271/169.0146/300.9971/463.0655                       |
| 38 | 8.40 | 635.0880 | 635.0890 | -1.57 | C27H24O19 | Trigalloyl-glucoside isomer 4                     | 125.0278/169.0143/313.0576/483.0790                       |
| 39 | 8.91 | 783.0687 | 783.0686 | 0.10  | C34H24O22 | Terflavin B isomer 1                              | 450.9983/631.0520                                         |
| 40 | 8.93 | 617.0775 | 617.0784 | -1.55 | C27H22O17 | Galloyl-HHDP-glucose isomer 1                     | 169.0123/300.9988                                         |
| 41 | 8.94 | 787.0977 | 787.0999 | -2.86 | C34H28O22 | Tetragalloyl-glucoside isomer 1                   | 169.0097/313.0591/465.0709/617.0779/<br>635.0878          |
| 42 | 9.18 | 757.0863 | 757.0894 | -4.05 | C33H26O21 | Balanophotannin E isomer 1                        | 125.0219/169.0131                                         |
| 43 | 9.27 | 937.0925 | 937.0953 | -2.93 | C41H30O26 | Trigalloyl-HHDP-glucose isomer 1                  | 169..0131/295.0461/300.9969                               |
| 44 | 9.28 | 783.0683 | 783.0686 | -0.44 | C34H24O22 | Terflavin B isomer 2                              | 783.0663                                                  |
| 45 | 9.39 | 276.9971 | 276.9990 | -6.65 | C12H6O8   | Galloflavin                                       | 169.0141                                                  |
| 46 | 9.47 | 300.9977 | 300.9990 | -4.43 | C14H6O8   | Ellagic acid                                      | 145.0327/245.0069/300.9953                                |
| 47 | 9.57 | 783.0671 | 783.0686 | -2.04 | C34H24O22 | Terflavin B isomer 3                              | 450.9964/631.0720                                         |
| 48 | 9.57 | 937.0949 | 937.0953 | -0.36 | C41H30O26 | Trigalloyl-HHDP-glucose isomer 2                  | 169.0134/275.0200/295.0451/300.9987/<br>313.0562/465.0669 |
| 49 | 9.58 | 935.0806 | 935.0796 | 1.01  | C41H28O26 | Digalloyl-lactonised valoneoyl-d-glucose isomer 1 | 125.0246/169.0140/300.9976/450.9925                       |

|    |       |           |           |       |           |                                                   |                                                           |
|----|-------|-----------|-----------|-------|-----------|---------------------------------------------------|-----------------------------------------------------------|
| 50 | 9.59  | 909.0993  | 909.1003  | -1.13 | C40H30O25 | trigalloyl-brevifolincarboxyl-glucose isomer 1    | 247.0258/435.0508/                                        |
| 51 | 9.61  | 787.0993  | 787.0999  | -0.81 | C34H28O22 | Tetragalloyl-glucoside isomer 2                   | 125.0241/169.0135/313.0585/465.0690/<br>617.0760/635.0874 |
| 52 | 9.63  | 289.0708  | 289.0718  | -3.43 | C15H14O6  | Catechin                                          | 245.0830                                                  |
| 53 | 9.67  | 787.0997  | 787.0999  | -0.31 | C34H28O22 | Tetragalloyl-glucoside isomer 3                   | 125.0232/169.0134/313.0546/617.0777/<br>635.0831          |
| 54 | 9.70  | 321.0238  | 321.0252  | -4.34 | C14H10O9  | Digallate isomer 2                                | 125.0229/169.0133                                         |
| 55 | 9.76  | 787.0988  | 787.0999  | -1.43 | C34H28O22 | Tetragalloyl-glucoside isomer 4                   | 125.0232/169.0140/313.0562/465.0684/<br>617.0783/635.0871 |
| 56 | 9.78  | 321.0242  | 321.0252  | -3.11 | C14H10O9  | Digallate isomer 3                                | 125.0238/169.0138                                         |
| 57 | 9.78  | 783.0677  | 783.0686  | -1.19 | C34H24O22 | Terflavin B isomer 4                              | 450.0698/631.0460                                         |
| 58 | 9.89  | 617.0776  | 617.0784  | -1.30 | C27H22O17 | Galloyl-HHDP-glucose isomer 2                     | 169.0141/300.9985                                         |
| 59 | 9.91  | 787.0987  | 787.0999  | -1.64 | C34H28O22 | Tetragalloyl-glucoside isomer 5                   | 125.0238/169.0141/313.0553/465.0697/<br>617.0778/635.0883 |
| 60 | 9.95  | 971.1000  | 971.1007  | -0.76 | C41H32O28 | Neochebulagic acid isomer 1                       | 300.9972/467.0727/935.0848/971.1000                       |
| 61 | 10.04 | 971.0992  | 971.1007  | -1.61 | C41H32O28 | Neochebulagic acid isomer 2                       | 300.9980/467.0734/971.0992                                |
| 62 | 10.05 | 477.1027  | 477.1039  | -2.41 | C22H22O12 | Isorhamnetin glucoside isomer 1                   | 271.0299/285.0424/317.0688                                |
| 63 | 10.06 | 289.0708  | 289.0718  | -3.18 | C15H14O6  | Epicatechin                                       | 109.0343/123.0090/245.0076                                |
| 64 | 10.25 | 301.0334  | 301.0354  | -6.72 | C15H10O7  | Quercetin                                         | 121.0292/151.0386/179.0370                                |
| 65 | 10.26 | 757.0882  | 757.0894  | -1.61 | C33H26O21 | Balanophotannin E isomer 2                        | 125.0219/169.0131/757.0882                                |
| 66 | 10.26 | 463.0867  | 463.0823  | 9.41  | C28H16O7  | Unknown 6                                         | ---                                                       |
| 67 | 10.27 | 935.0740  | 935.0796  | -5.99 | C41H28O26 | Digalloyl-lactonised valoneoyl-d-glucose isomer 2 | 125.0240/169.0144/301.0026//767.0713                      |
| 68 | 10.29 | 909.0990  | 909.1003  | -1.47 | C40H30O25 | trigalloyl-brevifolincarboxyl-glucose isomer 2    | 247.0258/435.0553/605.0803                                |
| 69 | 10.30 | 939.1064  | 939.1109  | -4.83 | C41H32O26 | Pentagalloyl-glucose isomer 1                     | 125.0228/169.0139/313.0529/465.0643/<br>617.0801          |
| 70 | 10.41 | 971.1002  | 971.1007  | -0.56 | C41H32O28 | Neochebulagic acid isomer 3                       | 300.9987/465.0658/935.0884/971.1002                       |
| 71 | 10.49 | 1087.0912 | 1087.0906 | 0.58  | C48H32O30 | Trigalloyl-lactonised valoneoyl glucose isomer 1  | 125.0228/169.0129/300.9972/615.0730                       |

|    |       |           |           |       |           |                                                                   |                                                                |
|----|-------|-----------|-----------|-------|-----------|-------------------------------------------------------------------|----------------------------------------------------------------|
| 72 | 10.49 | 1089.1055 | 1089.1062 | -0.61 | C48H34O30 | (Galloyl)galloyl-tetragalloylglucose isomer 1                     | 125.0227/169.0134/447.0501/465.0643/617.0733/769.0824/939.1045 |
| 73 | 10.59 | 909.0995  | 909.1003  | -0.91 | C40H30O25 | trigalloyl-brevifolincarboxyl-glucose isomer 3                    | 247.0263/435.0539/605.0590                                     |
| 74 | 10.65 | 953.0909  | 953.0902  | 0.74  | C41H30O27 | Trigalloyl-DHHDP-glucose isomer 1                                 | 125.0250/169.0134/275.0188/300.9972/445.0373                   |
| 75 | 10.66 | 935.0791  | 935.0796  | -0.57 | C41H28O26 | Digalloyl-lactonised valoneoyl-d-glucose isomer 3                 | 125.0235/169.0149/300.9918/767.0920                            |
| 76 | 10.70 | 933.0624  | 933.0640  | -1.64 | C41H26O26 | Castalagin                                                        | 933.0624                                                       |
| 77 | 10.70 | 937.0936  | 937.0953  | -1.81 | C41H30O26 | Trigalloyl-HHDP-glucose isomer 3                                  | 169.0125/295.0440/300.9983/313.051/599.0624                    |
| 78 | 10.71 | 941.0959  | 941.0902  | 6.05  | C41H34O26 | Galloyl-penta-hydroxy-benzoic-brevifolincarboxyl-glucose isomer 1 | 247.0227/291.0133/435.0532/757.0858                            |
| 79 | 10.72 | 939.1108  | 939.1109  | -0.10 | C41H32O26 | Pentagalloyl-glucose isomer 2                                     | 125.0245/169.0139/465.0652/617.0781/769.0894                   |
| 80 | 10.75 | 951.0757  | 951.0745  | 1.28  | C41H28O27 | Trisgalloyl HHDP glucose isomer 1                                 | 275.0240/300.9964/605.0799/783.0612/951.0757                   |
| 81 | 10.82 | 439.0658  | 439.0671  | -2.84 | C22H16O10 | Amurensisin                                                       | 439.0658                                                       |
| 82 | 10.92 | 953.0899  | 953.0902  | -0.31 | C41H30O27 | Trigalloyl-DHHDP-glucose isomer 2                                 | 125.0234/169.0140/301.0017/785.0820                            |
| 83 | 10.92 | 935.0794  | 935.0796  | -0.18 | C41H28O26 | Digalloyl-lactonised valoneoyl-d-glucose isomer 4                 | 125.0232/169.0142/300.9996/767.0502                            |
| 84 | 10.93 | 939.1104  | 939.1109  | -0.57 | C41H32O26 | Pentagalloyl-glucose isomer 3                                     | 169.0144/313.0536/465.0673/617.0775/247.0238/291.0046/757.0898 |
| 85 | 10.94 | 941.0942  | 941.0902  | -4.25 | C40H30O27 | Galloyl-penta-hydroxy-benzoic-brevifolincarboxyl-glucose isomer 2 |                                                                |
| 86 | 11.06 | 909.1003  | 909.1003  | -0.06 | C40H30O25 | trigalloyl-brevifolincarboxyl-glucose isomer 4                    | 169.0134/247.0242/291.0148/435.0642/                           |
| 87 | 11.23 | 925.0937  | 925.0953  | -1.64 | C40H30O26 | Phyllanthusiin C isomer 1                                         | 169.0133/247.0226/300.9927/435.0593/925.0937                   |
| 88 | 11.28 | 953.0887  | 953.0902  | -1.52 | C41H30O27 | Trigalloyl-DHHDP-glucose isomer 3                                 | 125.0241/169.0128/301.0095                                     |
| 89 | 11.29 | 197.0448  | 197.0455  | -3.77 | C9H10O5   | Ethyl gallate                                                     | 169.0131/124.0169/197.0448                                     |
| 90 | 11.30 | 909.0991  | 909.1003  | -1.33 | C40H30O25 | trigalloyl-brevifolincarboxyl-glucose isomer 5                    | 247.0229/291.0147/435.0540/605.0792                            |

|     |       |           |           |       |           |                                                                   |                                                                    |
|-----|-------|-----------|-----------|-------|-----------|-------------------------------------------------------------------|--------------------------------------------------------------------|
| 91  | 11.31 | 951.0737  | 951.0745  | -0.85 | C41H28O27 | Trisgalloyl HHDP glucose isomer 2                                 | 301.0014/605.0767/783.0887                                         |
| 92  | 11.39 | 1087.0901 | 1087.0906 | -0.40 | C48H32O30 | Trisgalloyl-lactonised valoneoyl glucose isomer 2                 | 125.0228/169.0129/300.9972/615.0730                                |
| 93  | 11.44 | 1089.1045 | 1089.1062 | -1.56 | C48H34O30 | (Galloyl)galloyl-tetragalloylglucose isomer 2                     | 125.0227/169.0130/447.0501/465.0662/<br>617.0750/769.0837/939.1060 |
| 94  | 11.47 | 1105.1029 | 1105.1011 | 1.58  | C48H34O31 | Digalloyl-HHDP-iso DHDG-glucose isomer 1                          | 169.0140/275.0172/300.9943/767.0491                                |
| 95  | 11.47 | 757.0888  | 757.0894  | -0.76 | C33H26O21 | Balanophotannin E isomer 3                                        | 125.0219/169.0131/757.0882                                         |
| 96  | 11.47 | 477.1029  | 477.1039  | -2.04 | C22H22O12 | Isorhamnetin glucoside isomer 2                                   | 271.0297/285.0422/317.0684                                         |
| 97  | 11.56 | 1091.1213 | 1091.1219 | -0.47 | C48H36O30 | Hexagalloyl-glucose isomer 1                                      | 169.0143/431.0576/617.0773/769.0881/<br>939.1062                   |
| 98  | 11.56 | 1087.0894 | 1087.0906 | -1.05 | C48H32O30 | Trisgalloyl-lactonised valoneoyl glucose isomer 3                 | 125.0219/169.0133/300.9963                                         |
| 99  | 11.60 | 299.9898  | 299.9912  | -4.58 | C14H5O8   | Ellagic acid derivative                                           | 299.9898                                                           |
| 100 | 11.63 | 1089.1052 | 1089.1062 | -0.96 | C48H34O30 | (Galloyl)galloyl-tetragalloylglucose isomer 3                     | 125.0227/169.0142/447.0501/465.0662/<br>617.0765/769.0887/939.1076 |
| 101 | 11.68 | 1089.1068 | 1089.1062 | 0.51  | C48H34O30 | (Galloyl)galloyl-tetragalloylglucose isomer 4                     | 125.0227/169.0149/447.0501/465.0662/<br>617.0771/769.0980/939.1094 |
| 102 | 11.69 | 941.0932  | 941.0902  | -3.18 | C40H30O27 | Galloyl-penta-hydroxy-benzoic-brevifolincarboxyl-glucose isomer 3 | 247.0244/291.0181/435.0531/757.0914                                |
| 103 | 11.72 | 1091.1222 | 1091.1219 | 0.35  | C48H36O30 | Hexagalloyl-glucose isomer 2                                      | 169.0133/313.0620/617.0771/769.0848/<br>939.1060                   |
| 104 | 11.77 | 617.0779  | 617.0784  | -0.87 | C27H22O17 | Galloyl-HHDP-glucose isomer 3                                     | 169.0134/300.9969                                                  |
| 105 | 11.86 | 1091.1223 | 1091.1219 | 0.38  | C48H36O30 | Hexagalloyl-glucose isomer 3                                      | 169.0128/313.0544/483.0786/617.0781/<br>787.0980/939.1072          |
| 106 | 12.02 | 1105.0998 | 1105.1011 | -1.16 | C48H34O31 | Digalloyl-HHDP-iso DHDG-glucose isomer 2                          | 169.0141/275.0171/300.9980/767.0490                                |
| 107 | 12.06 | 907.1187  | 907.1211  | -2.62 | C41H32O24 | Tetragalloyl-hydroxybenzoyl-glucopyranoside isomer 1              | 169.0131/300.9990                                                  |
| 108 | 12.09 | 1243.1330 | 1243.1328 | 0.10  | C55H40O34 | Heptagalloyl hexose isomer 1                                      | 169.0145/617.0778/787.1007/939.1128/<br>1091.1259                  |

|     |       |           |           |       |           |                                                          |                                                   |
|-----|-------|-----------|-----------|-------|-----------|----------------------------------------------------------|---------------------------------------------------|
| 109 | 12.11 | 469.0511  | 469.0471  | 8.55  | C15H18O17 | Galloylmyricetin                                         | 169.0141/469.0511                                 |
| 110 | 12.18 | 1243.1329 | 1243.1328 | 0.08  | C55H40O34 | Heptagalloyl hexose isomer 2                             | 169.0141/617.0781/769.0922/939.1141/<br>1091.1246 |
| 111 | 12.18 | 925.0942  | 925.0953  | -1.09 | C40H30O26 | Phyllanthusiin C isomer 2                                | 169.0141/247.0245/300.9989/755.0680               |
| 112 | 12.25 | 1105.0996 | 1105.1011 | -1.36 | C48H34O31 | Digalloyl-HHDP-iso DHDG-glucose<br>isomer 3              | 169.0140/275.0170/300.9983/767.0493               |
| 113 | 12.27 | 909.0997  | 909.1003  | -0.71 | C40H30O25 | trigalloyl-brevifolincarboxyl-glucose<br>isomer 6        | 247.0229/291.0147/435.0540/605.0792               |
| 114 | 12.30 | 1243.1334 | 1243.1328 | 0.47  | C55H40O34 | Heptagalloyl hexose isomer 3                             | 169.0147/617.0800/769.0877/939.1129/<br>1091.1222 |
| 115 | 12.55 | 907.1194  | 907.1211  | -1.80 | C41H32O24 | Tetragalloyl-hydroxybenzoyl-<br>glucopyranoside isomer 2 | 169.0126/300.9985                                 |
| 116 | 12.64 | 907.1194  | 907.1211  | -1.82 | C41H32O24 | Tetragalloyl-hydroxybenzoyl-<br>glucopyranoside isomer 3 | 169.0122/300.9987                                 |
| 117 | 13.97 | 983.1718  | 983.1793  | -7.62 | C37H44O31 | Unknown 7                                                | ---                                               |
| 118 | 14.64 | 329.2325  | 329.2333  | -2.67 | C18H34O5  | Trihydroxy-octadecenoic acid                             | 329.2325                                          |
| 119 | 16.82 | 315.1955  | 315.1966  | -3.54 | C20H28O3  | Hydroxyretinoic acid                                     | 315.1955                                          |
| 120 | 17.44 | 277.1798  | 277.1809  | -4.13 | C17H26O3  | Unknown 8                                                | ---                                               |
| 121 | 17.64 | 285.2057  | 285.2071  | -4.96 | C16H30O4  | Hexadecanedioic acid                                     | 285.2057                                          |
| 122 | 17.64 | 321.2423  | 321.2435  | -3.73 | C20H34O3  | Hydroxyeicosatrienoic acid                               | 321.2423                                          |
| 123 | 17.68 | 233.1537  | 233.1547  | -4.47 | C15H22O2  | Valerenic acid                                           | 233.1537                                          |
| 124 | 17.77 | 295.2267  | 295.2279  | -3.80 | C18H32O3  | Hydroxylinoleic acid                                     | 295.2267                                          |
| 125 | 17.81 | 279.2320  | 279.2330  | -3.49 | C18H32O2  | Linoleic acid                                            | 279.2320                                          |
| 126 | 17.87 | 293.2115  | 293.2122  | -2.43 | C18H30O3  | Hydroxylinolenic acid                                    | 293.2115                                          |
| 127 | 17.93 | 265.1795  | 265.1809  | -5.33 | C16H26O3  | Dodecenyl-succinic anhydride                             | 265.1795                                          |
| 128 | 18.17 | 299.2007  | 299.2017  | -3.05 | C20H28O2  | Retinoic acid                                            | 299.2007                                          |
| 129 | 18.24 | 281.2477  | 281.2486  | -3.16 | C18H34O2  | Oleic acid                                               | 281.2477                                          |
| 130 | 18.33 | 239.2003  | 239.2017  | -5.57 | C15H28O2  | Pentadecenoic acid                                       | 239.2003                                          |
| 131 | 18.36 | 443.3010  | 443.3014  | -0.89 | C24H44O7  | Oleiy l glucoside                                        | 443.3010                                          |
| 132 | 18.36 | 277.2165  | 277.2173  | -2.93 | C18H30O2  | Linolenic acid                                           | 277.2165                                          |
| 133 | 18.41 | 283.2629  | 283.2643  | -4.77 | C18H36O2  | Stearic acid                                             | 283.2629                                          |



|     |       |          |          |       |          |                        |          |
|-----|-------|----------|----------|-------|----------|------------------------|----------|
| 134 | 18.41 | 443.3367 | 443.3378 | -2.58 | C25H48O6 | Unknown 9              | ---      |
| 135 | 18.42 | 447.2741 | 447.2752 | -2.60 | C26H40O6 | Unknown 10             | ---      |
| 136 | 18.49 | 301.2166 | 301.2173 | -2.44 | C20H30O2 | Eicosapentaenoic acid  | 301.2166 |
| 137 | 18.50 | 253.2163 | 253.2173 | -3.89 | C16H30O2 | Palmitoleic acid       | 253.2163 |
| 138 | 18.56 | 279.2320 | 279.2330 | -3.50 | C18H32O2 | Linoleic acid          | 279.2320 |
| 139 | 18.58 | 243.1222 | 243.1238 | -6.41 | C12H20O5 | Oxodecanedioic acid    | 243.1222 |
| 140 | 18.62 | 317.2475 | 317.2486 | -3.46 | C21H34O2 | Methyl arachidonate    | 317.2475 |
| 141 | 18.65 | 503.3379 | 503.3378 | 0.24  | C30H48O6 | Arjungenin             | 503.3379 |
| 142 | 18.65 | 267.2321 | 267.2330 | -3.04 | C17H32O2 | Heptadecenoic acid     | 267.2321 |
| 143 | 18.66 | 465.3578 | 465.3585 | -1.51 | C28H50O5 | Unknown 11             | ---      |
| 144 | 18.70 | 471.3681 | 471.3691 | -2.15 | C27H52O6 | Unknown 12             | ---      |
| 145 | 18.70 | 369.2699 | 369.2646 | 14.15 | C21H38O5 | Glycerylmonooleate     | 369.2699 |
| 146 | 18.76 | 255.2321 | 255.2330 | -3.27 | C16H32O2 | Palmitic acid          | 255.2321 |
| 147 | 18.84 | 355.3209 | 355.3218 | -2.44 | C22H44O3 | Hydroxydocosanoic acid | 355.3209 |
| 148 | 20.83 | 283.1909 | 283.1915 | -2.05 | C16H28O4 | Dodecenylsuccinic acid | 283.1909 |

RT: retention time

Table S3. Compound areas extracted for each *Cytinus* extract.

| Peak | HEXANE   | ETHYL ACETATE | DICHLOROMETHANE | ETHANOL   | ETHANOL/WATER | WATER     | NADES A  | NADES B  | NADES C   |
|------|----------|---------------|-----------------|-----------|---------------|-----------|----------|----------|-----------|
| 1    | 4338.84  | 7065.39       | 1722.18         | ND        | 30270.76      | 9196.48   | ND       | 4257.48  | ND        |
| 2    | 1472.37  | 2555.67       | ND              | ND        | 26658.72      | 4787.31   | ND       | ND       | ND        |
| 3    | 3701.65  | 10686.53      | 3525.34         | 1193.59   | 11130.14      | 9630.11   | 5258.70  | 8258.92  | 6534.77   |
| 4    | ND       | ND            | ND              | ND        | ND            | ND        | ND       | 23668.11 | ND        |
| 5    | ND       | ND            | ND              | ND        | ND            | ND        | 43410.37 | ND       | 26187.67  |
| 6    | 5529.35  | 11446.12      | ND              | 5575.87   | 11922.77      | 3647.79   | ND       | ND       | ND        |
| 7    | ND       | ND            | ND              | ND        | ND            | ND        | ND       | ND       | 127404.30 |
| 8    | ND       | ND            | ND              | 3027.69   | 4149.75       | ND        | ND       | ND       | ND        |
| 9    | ND       | ND            | ND              | ND        | ND            | ND        | ND       | ND       | 79290.61  |
| 10   | ND       | 5836.29       | ND              | 2196.18   | 4929.46       | 2246.15   | ND       | ND       | ND        |
| 11   | ND       | ND            | ND              | 5409.12   | 3206.05       | ND        | ND       | ND       | ND        |
| 12   | 14467.47 | 11996.40      | ND              | 188302.61 | 71834.92      | 27602.13  | ND       | 15803.16 | ND        |
| 13   | 1901.12  | 61452.56      | ND              | 63652.51  | 4150ND        | 31270.43  | ND       | 9826.70  | ND        |
| 14   | 18705.91 | 131115.08     | ND              | 104956.04 | 105101.51     | 167287.82 | ND       | 7125.64  | ND        |
| 15   | ND       | 17787.67      | ND              | 16084.88  | 25204.94      | 28606.73  | 4668.04  | 7010.09  | 6979.67   |
| 16   | ND       | 7640.96       | ND              | 24611.76  | 28140.39      | 35129.83  | 7661.75  | 6806.10  | 4156.76   |
| 17   | ND       | 8006.45       | ND              | 6522.83   | 22798.39      | 18574.97  | ND       | 2330.38  | ND        |
| 18   | ND       | 8475.20       | ND              | ND        | ND            | 7478.05   | ND       | 6556.02  | ND        |
| 19   | ND       | 4098.23       | ND              | 8596.24   | 41135.99      | 36057.78  | ND       | 9140.80  | ND        |
| 20   | ND       | ND            | ND              | 4565.72   | 48566.66      | 35115.73  | ND       | 2311.39  | ND        |
| 21   | ND       | 11659.83      | ND              | 21870.97  | 33172.35      | 2909.42   | ND       | 4106.42  | ND        |
| 22   | ND       | 6319.32       | ND              | 18824.92  | 39406.30      | 24698.35  | ND       | 5947.75  | ND        |
| 23   | ND       | ND            | ND              | ND        | 20328.68      | 6145.20   | ND       | ND       | ND        |
| 24   | ND       | ND            | ND              | 1324.12   | 14369.48      | 5911.97   | ND       | ND       | ND        |
| 25   | 1397.47  | 9276.60       | ND              | ND        | ND            | ND        | ND       | ND       | ND        |
| 26   | ND       | 58810.84      | ND              | 81787.34  | 216160.54     | 142065.89 | 9038.45  | ND       | ND        |

|    |          |           |    |           |            |           |          |         |         |
|----|----------|-----------|----|-----------|------------|-----------|----------|---------|---------|
| 27 | ND       | 18678.25  | ND | 6843.51   | 11057.52   | 14186.62  | ND       | ND      | ND      |
| 28 | 2417.88  | 33927.38  | ND | 25050.89  | 49735.92   | 46090.20  | 5170.67  | ND      | ND      |
| 29 | ND       | ND        | ND | 3591.30   | 56844.72   | 25903.39  | 2442.57  | ND      | ND      |
| 30 | ND       | 6370.92   | ND | 11661.74  | 32055.64   | 11802.14  | ND       | ND      | ND      |
| 31 | ND       | ND        | ND | 4987.80   | 26798.91   | 1254.77   | ND       | ND      | ND      |
| 32 | 1084.70  | 33514.03  | ND | 30934.70  | 52235.40   | 30551.04  | ND       | ND      | ND      |
| 33 | ND       | 84849.87  | ND | 125377.26 | 262852.42  | 106751.63 | ND       | 1499.45 | ND      |
| 34 | ND       | 30683.41  | ND | 11464.54  | 16052.21   | 11953.01  | ND       | ND      | ND      |
| 35 | ND       | 30780.04  | ND | 53826.53  | 102630.93  | 40428.71  | ND       | 1697.95 | ND      |
| 36 | ND       | 4528.82   | ND | 19127.96  | 35912.21   | 4328.67   | ND       | ND      | ND      |
| 37 | ND       | 7278.28   | ND | 1689.37   | 4940.15    | 3152.29   | ND       | ND      | ND      |
| 38 | ND       | 13001.39  | ND | 32157.16  | 61366.06   | 21982.25  | ND       | ND      | ND      |
| 39 | ND       | 16659.90  | ND | 1064.04   | ND         | ND        | ND       | ND      | ND      |
| 40 | ND       | 9175.29   | ND | 12840.77  | 13054.64   | 7980.43   | ND       | ND      | ND      |
| 41 | ND       | 53399.17  | ND | 265818.56 | 184755.56  | 77494.68  | ND       | ND      | ND      |
| 42 | ND       | 8968.07   | ND | 31473.02  | 78504.05   | 27301.00  | ND       | ND      | ND      |
| 43 | ND       | ND        | ND | ND        | 19202.85   | ND        | ND       | ND      | ND      |
| 44 | ND       | 12358.48  | ND | 2328.27   | ND         | ND        | ND       | ND      | ND      |
| 45 | 16208.14 | 15082.45  | ND | ND        | ND         | ND        | ND       | ND      | ND      |
| 46 | 22672.55 | 248841.27 | ND | 361874.10 | 115949.04  | 109713.73 | 6350.37  | 2969.21 | ND      |
| 47 | 1034.34  | 13423.75  | ND | 3265.64   | ND         | ND        | ND       | ND      | ND      |
| 48 | 5665.86  | 46970.87  | ND | 31365.63  | 44628.25   | 18129.81  | ND       | ND      | ND      |
| 49 | 1547.67  | 6704.43   | ND | 1733.79   | ND         | ND        | ND       | ND      | ND      |
| 50 | ND       | 43400.52  | ND | 25032.40  | 5406.55    | 1051.77   | ND       | ND      | ND      |
| 51 | 30707.11 | 259404.70 | ND | 250879.69 | 1027511.76 | 342713.83 | 2612.51  | ND      | 1370.26 |
| 52 | ND       | 3846.58   | ND | 1186.27   | 4159.85    | 1630.87   | ND       | ND      | ND      |
| 53 | 80419.98 | 633350.06 | ND | 506625.26 | 707367.44  | 273110.44 | 8629.73  | ND      | 1209.28 |
| 54 | ND       | 5658.15   | ND | 1336.08   | 1957.65    | 1068.36   | ND       | ND      | ND      |
| 55 | 33815.49 | 137013.88 | ND | 354567.80 | 178583.98  | 267247.71 | 15013.78 | ND      | ND      |

|    |           |           |    |           |           |           |          |    |    |
|----|-----------|-----------|----|-----------|-----------|-----------|----------|----|----|
| 56 | ND        | 19372.27  | ND | 14787.16  | 14535.46  | 9567.92   | ND       | ND | ND |
| 57 | 8336.46   | 74712.31  | ND | 36873.82  | 5089.53   | ND        | ND       | ND | ND |
| 58 | 13715.91  | 69829.43  | ND | 42085.46  | 66113.87  | 31639.05  | 2666.10  | ND | ND |
| 59 | 14794.27  | 157672.40 | ND | 122414.62 | 138787.17 | 103658.89 | 2963.01  | ND | ND |
| 60 | ND        | 54400.71  | ND | 8907.23   | 108740.88 | 32329.29  | ND       | ND | ND |
| 61 | ND        | 1799.95   | ND | 14450.29  | 29262.10  | 49641.96  | ND       | ND | ND |
| 62 | 2189.43   | 20697.98  | ND | 6965.75   | 22803.53  | 13431.12  | ND       | ND | ND |
| 63 | ND        | 9778.59   | ND | 2530.61   | 7839.58   | 3700.88   | ND       | ND | ND |
| 64 | ND        | 6188.82   | ND | ND        | 1794.60   | ND        | ND       | ND | ND |
| 65 | ND        | 87215.19  | ND | 29298.44  | 40173.29  | 6247.25   | ND       | ND | ND |
| 66 | 4219.77   | 30505.13  | ND | 5771.66   | 12109.67  | 8649.01   | ND       | ND | ND |
| 67 | ND        | 2103.06   | ND | 19950.34  | ND        | ND        | ND       | ND | ND |
| 68 | 2752.59   | 72049.91  | ND | 142068.56 | 156439.91 | 54841.88  | ND       | ND | ND |
| 69 | 1143.17   | 404193.73 | ND | 236769.93 | 13467.65  | 15106.64  | ND       | ND | ND |
| 70 | ND        | ND        | ND | ND        | 14644.65  | ND        | ND       | ND | ND |
| 71 | ND        | 6478.85   | ND | 1714.33   | 3865.00   | ND        | ND       | ND | ND |
| 72 | ND        | 35942.25  | ND | 19764.80  | 30247.87  | 6376.75   | ND       | ND | ND |
| 73 | 5966.76   | 113855.43 | ND | 28638.11  | 29648.77  | 75826.53  | ND       | ND | ND |
| 74 | 6467.43   | 11942.60  | ND | ND        | ND        | ND        | ND       | ND | ND |
| 75 | 27165.36  | 152437.45 | ND | 78037.15  | 12586.65  | 1392.05   | 5759.60  | ND | ND |
| 76 | 7084.15   | 6187.25   | ND | ND        | ND        | ND        | ND       | ND | ND |
| 77 | 36021.36  | 76080.04  | ND | 32011.54  | 25074.93  | 41520.12  | 7499.54  | ND | ND |
| 78 | 15915.66  | 129718.56 | ND | 43788.92  | 112737.24 | 56303.96  | 3801.53  | ND | ND |
| 79 | 118853.81 | 818869.43 | ND | 333807.22 | 871883.28 | 397631.65 | 29712.99 | ND | ND |
| 80 | 2646.50   | 4176.48   | ND | ND        | ND        | ND        | ND       | ND | ND |
| 81 | 5100.72   | 11591.55  | ND | 11005.97  | 12926.32  | 1983.76   | ND       | ND | ND |
| 82 | ND        | 32800.47  | ND | 3773.28   | ND        | 1770.73   | ND       | ND | ND |
| 83 | 8113.54   | 40949.78  | ND | 13766.61  | ND        | ND        | ND       | ND | ND |
| 84 | 45716.11  | 314291.23 | ND | 369919.70 | 246187.18 | 116090.27 | 11758.60 | ND | ND |

|     |          |            |    |           |           |           |          |    |    |
|-----|----------|------------|----|-----------|-----------|-----------|----------|----|----|
| 85  | 8609.28  | 41277.39   | ND | 25803.11  | 27724.85  | 19272.67  | ND       | ND | ND |
| 86  | 8700.39  | 391608.25  | ND | 72172.26  | 36095.88  | ND        | ND       | ND | ND |
| 87  | 15935.92 | 28102.85   | ND | 7673.46   | 95873.44  | 98623.98  | ND       | ND | ND |
| 88  | 3084.20  | 56921.88   | ND | ND        | 20574.53  | 10055.08  | ND       | ND | ND |
| 89  | ND       | ND         | ND | 108506.29 | 366215.51 | 34192.44  | ND       | ND | ND |
| 90  | 16044.25 | 268972.05  | ND | 33458.69  | 27742.27  | 20464.92  | ND       | ND | ND |
| 91  | ND       | 8281.56    | ND | ND        | ND        | 4985.21   | ND       | ND | ND |
| 92  | 6560.94  | 44341.02   | ND | 16563.90  | ND        | ND        | ND       | ND | ND |
| 93  | 15671.57 | 48432.33   | ND | 4096.28   | 17796.50  | 15682.36  | 2749.40  | ND | ND |
| 94  | 2205.60  | 11538.85   | ND | 3173.73   | ND        | ND        | ND       | ND | ND |
| 95  | ND       | 1579.88    | ND | 10219.14  | 4571.93   | ND        | ND       | ND | ND |
| 96  | ND       | 4728.01    | ND | 1352.28   | 4218.35   | ND        | ND       | ND | ND |
| 97  | 51892.39 | 1493282.89 | ND | 522061.40 | 473458.85 | 258619.65 | 8482.52  | ND | ND |
| 98  | 9152.30  | 89461.85   | ND | 29034.75  | 1854.74   | ND        | ND       | ND | ND |
| 99  | 12444.07 | 13344.52   | ND | ND        | ND        | 3475.05   | ND       | ND | ND |
| 100 | 16466.56 | 37016.38   | ND | 17856.75  | 7535.48   | 25119.70  | ND       | ND | ND |
| 101 | 13701.74 | 14236.06   | ND | 3579.61   | 3696.42   | 8601.61   | ND       | ND | ND |
| 102 | ND       | 14344.14   | ND | 5339.73   | 8188.67   | 4347.30   | ND       | ND | ND |
| 103 | 37469.90 | 755457.92  | ND | 285159.28 | 192968.24 | 188886.92 | 7425.81  | ND | ND |
| 104 | 14973.69 | 39588.58   | ND | 9461.59   | 20138.06  | 16744.81  | 1240.38  | ND | ND |
| 105 | 11368.42 | 534998.11  | ND | 92829.61  | 79504.37  | 82015.40  | 3608.48  | ND | ND |
| 106 | ND       | 28418.00   | ND | ND        | 9495.36   | 2078.96   | ND       | ND | ND |
| 107 | ND       | 1617.21    | ND | 1192.53   | 2827.25   | ND        | ND       | ND | ND |
| 108 | 22918.51 | 328417.17  | ND | 176919.14 | 200188.37 | 63777.81  | ND       | ND | ND |
| 109 | 64662.43 | 270222.91  | ND | 183482.92 | 158255.47 | 122494.31 | 20510.14 | ND | ND |
| 110 | 17556.97 | 627993.91  | ND | 84204.01  | 82089.09  | 75511.34  | 2216.18  | ND | ND |
| 111 | ND       | 4882.04    | ND | ND        | 13047.30  | 7265.10   | ND       | ND | ND |
| 112 | ND       | 32098.89   | ND | ND        | 7102.96   | 3878.93   | ND       | ND | ND |
| 113 | ND       | 8507.01    | ND | 46403.07  | 21450.29  | ND        | ND       | ND | ND |

|     |            |           |           |           |          |          |         |         |          |
|-----|------------|-----------|-----------|-----------|----------|----------|---------|---------|----------|
| 114 | 4239.76    | 146512.72 | ND        | 115350.99 | 35145.26 | 25814.04 | ND      | ND      | ND       |
| 115 | 1458.88    | 22632.77  | ND        | 12669.56  | 29772.98 | 9460.95  | ND      | ND      | ND       |
| 116 | 1766.48    | 33807.06  | ND        | 16511.20  | ND       | 14116.06 | ND      | ND      | ND       |
| 117 | ND         | ND        | ND        | 12143.46  | ND       | ND       | ND      | ND      | ND       |
| 118 | ND         | 6194.09   | 2769.14   | ND        | ND       | ND       | ND      | ND      | ND       |
| 119 | 4069.42    | ND        | 8488.11   | ND        | ND       | ND       | ND      | ND      | ND       |
| 120 | 53788.12   | 6452.42   | 9039.54   | ND        | ND       | ND       | ND      | ND      | ND       |
| 121 | 1961.09    | 1459.22   | 3745.80   | ND        | ND       | ND       | ND      | ND      | ND       |
| 122 | 25225.84   | 8716.90   | 34509.81  | 1285.17   | ND       | ND       | ND      | ND      | ND       |
| 123 | 6166.83    | 3871.31   | 1475.96   | 3372.77   | ND       | ND       | ND      | ND      | ND       |
| 124 | 97783.28   | 3427.90   | 136125.99 | ND        | ND       | ND       | ND      | ND      | ND       |
| 125 | ND         | 9682.04   | 23636.71  | 15622.94  | ND       | ND       | ND      | ND      | ND       |
| 126 | 122238.57  | 26750.06  | 136580.79 | 4378.40   | 6781.62  | ND       | ND      | ND      | ND       |
| 127 | 21625.99   | 30707.05  | 83150.73  | 4212.01   | ND       | ND       | ND      | ND      | ND       |
| 128 | 194635.18  | 27162.05  | 93989.75  | ND        | ND       | ND       | ND      | ND      | ND       |
| 129 | 90252.28   | 37537.68  | 15947.25  | 26779.59  | 14927.91 | ND       | ND      | 7959.44 | ND       |
| 130 | 17263.68   | 149506.16 | 4095.66   | 15227.45  | 1816.83  | ND       | ND      | ND      | ND       |
| 131 | ND         | 1295.72   | 1260.85   | ND        | ND       | ND       | ND      | ND      | ND       |
| 132 | 779958.30  | 242902.29 | 409680.44 | 114158.98 | 9198.53  | 10325.82 | ND      | ND      | ND       |
| 133 | 3416.20    | 2793.43   | ND        | 3194.68   | ND       | ND       | ND      | ND      | ND       |
| 134 | 6031.34    | 279655.89 | 646352.24 | 25009.52  | 1556.71  | ND       | ND      | ND      | ND       |
| 135 | 88370.14   | 139945.06 | 198971.53 | 11084.94  | ND       | ND       | ND      | ND      | ND       |
| 136 | 256344.58  | 29099.00  | 61100.06  | 4059.43   | ND       | 4392.64  | ND      | ND      | ND       |
| 137 | 231204.73  | 25035.77  | 85198.62  | ND        | 3628.17  | 10599.62 | 8726.90 | ND      | 13643.13 |
| 138 | 1606236.39 | 809201.91 | 997252.29 | 243316.46 | 16767.71 | 17813.99 | ND      | ND      | 2813.88  |
| 139 | 1386.67    | ND        | ND        | ND        | ND       | ND       | ND      | ND      | ND       |
| 140 | 62034.03   | 72101.36  | 67311.22  | 15225.84  | ND       | ND       | ND      | ND      | ND       |
| 141 | ND         | ND        | 2067.78   | ND        | ND       | ND       | ND      | ND      | ND       |
| 142 | 29547.71   | ND        | ND        | ND        | 1312.57  | 1673.54  | ND      | ND      | ND       |
| 143 | ND         | 68825.70  | 5705.54   | 2324.25   | ND       | ND       | ND      | ND      | ND       |

|     |          |           |           |          |          |          |         |          |          |
|-----|----------|-----------|-----------|----------|----------|----------|---------|----------|----------|
| 144 | 7441.97  | 279347.67 | 470625.64 | 51871.42 | 2227.49  | 1366.67  | ND      | ND       | ND       |
| 145 | 2796.68  | ND        | ND        | ND       | ND       | ND       | ND      | ND       | ND       |
| 146 | 63212.10 | ND        | ND        | 16207.43 | 19130.50 | 11747.47 | 8587.15 | 15350.41 | 19887.52 |
| 147 | 11125.89 | 8650.51   | 6534.18   | 10880.60 | 1160.23  | ND       | ND      | ND       | ND       |
| 148 | ND       | 10445.88  | ND        | ND       | 9401.83  | ND       | ND      | ND       | ND       |

ND: non detected.

Table S4. Antioxidant properties of the tested extracts.

| Solvents        | DPPH (mg TE/g)            | ABTS (mg TE/g)             | CUPRAC (mg TE/g)           | FRAP (mg TE/g)             | MCA (mg EDTAE/g)        | PBD (mmol TE/g)         |
|-----------------|---------------------------|----------------------------|----------------------------|----------------------------|-------------------------|-------------------------|
| Hexane          | 70.19±2.42 <sup>e</sup>   | 172.56±6.15 <sup>f</sup>   | 97.41±1.42 <sup>e</sup>    | 84.11±1.66 <sup>f</sup>    | 9.55±0.53 <sup>e</sup>  | 1.27±0.04 <sup>e</sup>  |
| Ethyl acetate   | 938.84±0.55 <sup>a</sup>  | 4009.94±18.45 <sup>a</sup> | 1377.38±49.12 <sup>b</sup> | 1196.05±29.33 <sup>c</sup> | 11.88±0.24 <sup>d</sup> | 3.94±0.12 <sup>a</sup>  |
| Dichloromethane | 93.25±0.44 <sup>e</sup>   | 398.03±3.66 <sup>e</sup>   | 154.43±0.91 <sup>e</sup>   | 136.68±2.67 <sup>f</sup>   | 14.82±0.51 <sup>c</sup> | 1.51±0.05 <sup>d</sup>  |
| Ethanol         | 935.68±1.08 <sup>a</sup>  | 4012.39±15.59 <sup>a</sup> | 1332.52±21.37 <sup>b</sup> | 1214.23±47.64 <sup>c</sup> | 10.26±0.13 <sup>e</sup> | 3.27±0.06 <sup>bc</sup> |
| Ethanol/water   | 939.35±1.78 <sup>a</sup>  | 4026.50±14.06 <sup>a</sup> | 1730.38±89.51 <sup>a</sup> | 1534.85±42.81 <sup>a</sup> | 14.14±0.19 <sup>c</sup> | 3.48±0.07 <sup>b</sup>  |
| Water           | 933.74±3.22 <sup>a</sup>  | 3973.50±56.53 <sup>a</sup> | 1278.06±62.55 <sup>b</sup> | 1432.77±2.73 <sup>b</sup>  | 17.49±0.69 <sup>b</sup> | 3.81±0.08 <sup>a</sup>  |
| NADES-A         | 829.11±43.29 <sup>b</sup> | 2830.66±67.42 <sup>b</sup> | 833.38±6.17 <sup>c</sup>   | 968.98±19.43 <sup>d</sup>  | 21.76±0.72 <sup>a</sup> | 3.48±0.04 <sup>b</sup>  |
| NADES-B         | 767.55±17.15 <sup>c</sup> | 2285.15±13.73 <sup>c</sup> | 774.94±20.01 <sup>cd</sup> | 860.90±6.08 <sup>e</sup>   | na                      | 3.32±0.12 <sup>b</sup>  |
| NADES-C         | 712.48±28.19 <sup>d</sup> | 2134.94±31.58 <sup>c</sup> | 699.44±8.78 <sup>d</sup>   | 799.20±16.74 <sup>e</sup>  | 6.87±0.70 <sup>f</sup>  | 3.09±0.08 <sup>c</sup>  |

Values are reported as mean ±SD of three parallel measurements. TE: Trolox equivalent; EDTAE: EDTA equivalent; na: not active. Different letters in same column indicate significant differences in the tested extracts (p<0.05)

Table S5. Enzyme inhibitory of the tested extracts.

| Solvents        | AChE (mg GALAE/g)       | BChE (mg GALAE/g)       | Tyrosinase (mg KAE/g)    | Amylase (mmol ACAE/g)  | Glucosidase (mmol ACAE/g) |
|-----------------|-------------------------|-------------------------|--------------------------|------------------------|---------------------------|
| Hexane          | 7.32±0.14 <sup>e</sup>  | 1.39±0.04 <sup>d</sup>  | 49.14±0.34 <sup>f</sup>  | 0.50±0.01 <sup>c</sup> | 1.00±0.12 <sup>bc</sup>   |
| Ethyl acetate   | 9.00±0.01 <sup>b</sup>  | 1.73±0.06 <sup>bc</sup> | 81.29±0.12 <sup>d</sup>  | 0.54±0.01 <sup>c</sup> | 0.93±0.02 <sup>c</sup>    |
| Dichloromethane | 8.03±0.27 <sup>d</sup>  | 1.52±0.06 <sup>cd</sup> | 60.27±0.78 <sup>e</sup>  | 0.54±0.01 <sup>c</sup> | 1.01±0.05 <sup>bc</sup>   |
| Ethanol         | 9.00±0.02 <sup>b</sup>  | 2.13±0.18 <sup>a</sup>  | 78.41±0.64 <sup>d</sup>  | 0.35±0.01 <sup>d</sup> | 1.01±0.01 <sup>bc</sup>   |
| Ethanol/water   | 8.88±0.09 <sup>bc</sup> | 1.87±0.09 <sup>b</sup>  | 79.94±0.40 <sup>d</sup>  | 0.40±0.02 <sup>d</sup> | 1.02±0.01 <sup>bc</sup>   |
| Water           | 8.63±0.02 <sup>c</sup>  | na                      | 80.55±0.19 <sup>d</sup>  | 1.01±0.03 <sup>b</sup> | 1.06±0.01 <sup>b</sup>    |
| NADES-A         | 15.16±0.20 <sup>a</sup> | na                      | 153.97±0.96 <sup>b</sup> | 0.38±0.01 <sup>d</sup> | 2.15±0.01 <sup>a</sup>    |
| NADES-B         | na                      | na                      | 94.25±2.59 <sup>c</sup>  | 2.49±0.07 <sup>a</sup> | 2.17±0.01 <sup>a</sup>    |
| NADES-C         | na                      | na                      | 164.12±0.61 <sup>a</sup> | 2.54±0.04 <sup>a</sup> | 2.20±0.01 <sup>a</sup>    |

Values are reported as mean ±SD of three parallel measurements. GALAE: Galantamine; KAE: Kojic acid; ACAE: Acarbose equivalent; na: not active. Different letters in same column indicate significant differences in the tested extracts (p<0.05)
